# Supplementary material for: Minimally invasive transforaminal lumbar interbody fusion versus microscopic lumbar interbody fusion for the treatment of lumbar degenerative diseases: a radiological imaging-based retrospective study
Source: Research Square preprint supplement (doi:10.21203/rs.3.rs-7337627/v1), 2025-09-02
Supplement: Supplementary file 1 [file 4e4d4a3df0938e81e46de134.xlsx]

## Sheet: Sheet1
	Table 2. Comparison Table of Implant Parameters
	Parameters	Microscopic surgery (n = 68)	Passage surgery (n = 86)	Statistical value	P-value
	Fusion segment distribution (%)			χ²=4.32	0.115
	L4/L5	89.7% (n=61)	96.5% (n=83)
	L5/S1	10.3% (n=7)	3.5% (n=3)
	Screw length (mm)
	Upper screw	45.7±2.8	46.2±3.1	t=-1.02	0.31
	Lower screw	44.8±3.3	45.1±3.6	t=-0.58	0.562
	Screw diameter (mm)
	Upper screw	6.5±0.2	6.5±0.3	Z=-0.75	0.452
	Lower screw	5.4±0.4	5.3±0.5	Z=-1.32	0.187
	Fusion device size (mm)
	Length	23.5±2.8	24.1±3.2	t=-1.25	0.214
	Width	11.8±1.6	10.7±1.9	Z=3.28	0.021
	Height	9.8±0.9	9.6±1.1	Z=1.14	0.254
	Nail rod length (mm)	44.2±7.3	43.1±6.8	t=0.92	0.359
