# Supplementary material for: Minimally invasive transforaminal lumbar interbody fusion versus microscopic lumbar interbody fusion for the treatment of lumbar degenerative diseases: a radiological imaging-based retrospective study
Source: Research Square preprint supplement (doi:10.21203/rs.3.rs-7337627/v1), 2025-09-02
Supplement: Supplementary file 2 [file 63198c554724e4284ddc6cb4.xlsx]

## Sheet: Sheet1
	Table 1: Comparison of Baseline Characteristics of Patients (n = 178)
	Variable	The microscopic surgery group (n = 75)	The channel surgery group (n = 103)	Statistical value	P-value
	Age (years)	58.2 ± 8.9	58.7 ± 9.4	t = -0.35	0.726
	Female (n, %)	43 (57.3%)	63 (61.2%)	χ² = 0.26	0.612
	BMI (kg/㎡)	24.7 ± 2.9 (n=73)	24.8 ± 3.5 (n=96)	t = -0.15	0.882
	Length of hospital stay (days)	14.1 ± 4.3	14.8 ± 5.2	t = -0.92	0.36
	Fusion segment
	L2/L3	4	5
	L3/L4	5	7
	L4/L5	56	76
	L5/S1	9	14
