# Supplementary material for: Minimally invasive transforaminal lumbar interbody fusion versus microscopic lumbar interbody fusion for the treatment of lumbar degenerative diseases: a radiological imaging-based retrospective study
Source: Research Square preprint supplement (doi:10.21203/rs.3.rs-7337627/v1), 2025-09-02
Supplement: Supplementary file 3 [file 710ceba6354974cefc7ed834.xlsx]

## Sheet: Sheet1
	Table 4. Comparison of Imaging Parameters for Two Minimally Invasive Surgical Approaches
	Indicators	Group	Cases	Before the operation (°)	Postoperatively (°)	Change amount (°)	Group P value	Inter-group P value (change amount)
	Lumbar lordosis angle	Microscopic group	60	30.21±11.24	30.18±11.91	-0.03±10.10	0.978	0.021
		Channel Group	65	28.72±13.31	28.62±14.24	-0.10±8.77	0.932
	Cobb angle	Microscopic group	60	5.15±4.81	4.72±5.58	-0.43±5.27	0.532	0.003
		Channel Group	65	5.36±5.12	3.54±3.97	-1.82±4.11	<0.001
	Pelvic incidence angle	Microscopic group	60	54.15±11.52	54.29±11.57	0.14±8.61	0.899	0.832
		Channel Group	65	55.01±13.15	55.11±12.83	0.10±7.95	0.917
	Sacral inclination angle	Microscopic group	60	35.87±9.23	35.06±9.81	-0.81±7.91	0.427	0.041
		Channel Group	65	35.25±10.34	35.88±10.77	0.63±8.12	0.534
	Pelvic inclination angle	Microscopic group	60	18.28±9.45	20.23±10.12	1.95±8.67	0.083	0.002
		Channel Group	65	19.65±10.31	17.01±9.86	-2.64±7.95	0.009
	Slip angle	Microscopic group	60	20.85±7.92	20.16±8.45	-0.69±7.01	0.456	0.615
		Channel Group	65	19.78±8.13	20.33±9.24	0.55±8.67	0.612
