# Supplementary material for: Minimally invasive transforaminal lumbar interbody fusion versus microscopic lumbar interbody fusion for the treatment of lumbar degenerative diseases: a radiological imaging-based retrospective study
Source: Research Square preprint supplement (doi:10.21203/rs.3.rs-7337627/v1), 2025-09-02
Supplement: Supplementary file 4 [file 9211a4a1894e7ff65c9e837a.xlsx]

## Sheet: Sheet1
	Table 3. Comparison of vertebral-related data before and after surgery
	Indicators	The microscopic group (n = 45)		Intra-group comparison (p-value)	Channel group (n = 52)		Intra-group comparison (p-value)	Improve the disparity of values	Inter-group comparison (p-value)
		Before the operation	After the operation		Before the operation	After the operation
	Intervertebral inclination angle (°)	7.2±3.8	6.1±4.2	p=0.002	6.5±3.9	6.8±4.6	p=0.361	1.4±0.5	0.007
	Intervertebral height (mm)	8.9±2.7	11.8±2.1	p<0.001	9.1±2.5	11.6±3.0	p<0.001	0.4±0.3	0.187
	Slip distance (mm)	4.2±3.5	2.3±2.1	p<0.001	3.1±3.8	1.8±2.4	p<0.001	0.6±0.4	0.132
	Slip degree (%)	11.3±8.6	6.4±6.2	p<0.001	9.2±10.1	5.3±6.8	p<0.001	1.0±0.7	0.154
	Vertebral body length (mm)	35.2±4.1			34.8±4.3				0.496
	Vertebral body height (mm)	25.6±3.2			24.9±3.6				0.162
